# Supplementary material for: Predicting Sustainability Performance in Construction Projects Using
Source: Research Square preprint supplement (doi:10.21203/rs.3.rs-7664289/v1), 2025-10-22

## Ethical Clearance Certificate

The Research Ethics Committee at King Khalid University (HAPO-06-B-001)  
has reviewed and agreed on the project shown below:

|                       |                                                                                                                     |
|-----------------------|---------------------------------------------------------------------------------------------------------------------|
| <b>Approval No.</b>   | <b>ECM#2024-3195</b>                                                                                                |
| <b>Name of PI</b>     | <b>Saleh Hamed J Alsulamy</b>                                                                                       |
| <b>Research title</b> | Sustainability Assessment in Construction Projects Using Multi-Criteria Decision-Making and Artificial Intelligence |
| <b>Approval date</b>  | 30/12/2024                                                                                                          |
| <b>Expiry date</b>    | 29/12/2025                                                                                                          |
| <b>Decision</b>       | Approved                                                                                                            |

### Conditions of approval

- The conduction of research should be strictly in accordance with the approved proposal.
- The principal investigator must obtain the approval from related parties in order to conduct the research on the target group.
- The principal investigator must officially inform the Research ethics committee if any changes arise to the protocol and/or the target group of the research.
- Any amendments to the approved proposal require the submission and the approval from the Research Ethics Committee before implementation.
- The principal investigator must immediately notify the Research Ethics Committee in writing if the project is discontinued.

- The principal investigator must submit a monitoring report every 6 months and a final report at the end of the project. The final monitoring report should be submitted to the Research Ethics committee at KKU prior to the expiry date.
- In the event of any breach of bioethics rules approved by the National Committee of Bioethics (NCBE) and /or conducting any inadequate practice and /or any action that may adversely affect the participants, the principal investigator shall be liable for that. And the principal investigator must report the breach immediately to the Research Ethics Committee at KKU.

**THE RESEARCH ETHICS COMMITTEE HAS THE RIGHT TO CANCEL THE  
ETHICAL APPROVAL IN CASE OF FAILURE TO COMPLY WITH THE  
ABOVE LISTED CONDITIONS.**

**Dr. Mohammad Y. Abodahmah**

Chairperson of the Research Ethics Committee  
King Khalid University  
KSA

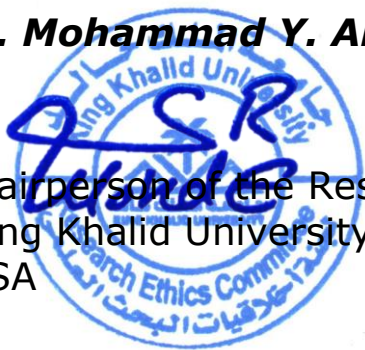

Supplement: Supplementary file 1 [file 8d086287b3c57a6840b944f9.pdf]
